# Supplementary material
Source: Springer Nature journal article supplement (https://www.springermedizin.de/resource/supplementary/12891_2013_2059_MOESM1_ESM.pdf/9509320)
Supplement: MOESM1 [file 9509320]

**Putting theory into practice:  
helpful & unhelpful aspects of training**

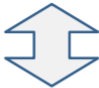

**Challenging professional identity:  
factors influencing learning & implementation of skills**

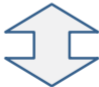

**Enhanced consultations:  
tools and techniques to support behaviour change**
